# Supplementary material
Source: PubMed Central journal article supplement (PMC3286991)
Supplement: 1117872109_pnas.201117872SI.pdf [file 1117872109_pnas.201117872SI.pdf]

# Supporting Information

Hu et al. 10.1073/pnas.1117872109

## Other Supporting Information Files

[Dataset S1 \(TXT\)](#)

[Dataset S2 \(TXT\)](#)
